---

**Comparisons of ape and human sequences that regulate mitochondrial DNA transcription and D-loop DNA synthesis**

---

David R. Foran, James E. Hixson<sup>+</sup> and Wesley M. Brown\*

---

Department of Biology, University of Michigan, Ann Arbor, MI 48109-1048, USA

---

Received March 25, 1988; Revised and Accepted June 1, 1988

---

**ABSTRACT**

The mitochondrial DNA (mtDNA) control regions for common chimpanzee, pygmy chimpanzee and gorilla were sequenced and the lengths and termini of their D-loop DNA's characterized. In these and all other species for which there are data, 5' termini map to sequences that contain the trinucleotide YAY. 3' termini are 25-51 nucleotides downstream from a sequence that is moderately conserved among vertebrates. Substitutions were >1.5 times more frequent in the control region than in regions encoding structural genes. Additions and deletions were also frequent, especially in gorilla. Sequences of promoters and of two of four transcription factor binding sites were highly conserved. Comparisons of sequence similarity and transition/transversion ratios suggest that human and chimpanzees may be more closely related to each other than either is to gorilla, if substitution rates are approximately equal among these species.

**INTRODUCTION**

The control region of vertebrate mtDNA, located between the genes for tRNA<sup>Pro</sup> and tRNA<sup>Phe</sup>, contains sites that regulate mtDNA replication and transcription (reviewed in 1-5). A three-stranded DNA structure, the D-loop, is formed within this region by displacement synthesis of a short DNA strand complementary to the L-strand of mtDNA. This short strand, called D-loop DNA, ranges in size from ca. 500 to 1700 nucleotides (nt) among vertebrate species, and two or more discrete size classes are usually occur within individuals (6-12). Direct evidence for a precursor-product relationship between D-loop DNA and newly replicated H-strand DNA is lacking; however, the 5' termini of D-loop DNA's and the 5' termini of replicating H-strands are identical (13). The same sequences are probably responsible for initiating both D-loop DNA synthesis and mtDNA replication.

Control region sequences are known for several vertebrate

mtDNA's, and relatively conserved sequence elements within and flanking the D-loop have been identified (8,12,14-20). Some of these elements appear to function in D-loop DNA synthesis, but the functions of others are unknown. Six other elements, with less conserved primary sequences, appear to function in the transcription of human mtDNA (1,5,21). Two are promoters for the mtDNA H- and L-strands. There is disagreement about the exact locations of these (22,23). The remaining four are in vitro binding sites for a mitochondrial transcription factor (21); however, two are physically removed from either promoter and are of questionable function.

A number of elements upstream of the 5' termini of D-loop DNA's have been proposed to be important in initiating mtDNA replication (4,19,24-26), but functional correlations exist for only two. The L-strand promoter appears to prime D-loop DNA synthesis (24,26), and an endoribonuclease cleavage site may be important in switching synthesis from RNA to DNA (25).

A sequence element 25 to 65 nt upstream (5') of the 3' termini of D-loop DNA's may be a signal for the termination of their synthesis (12,27). The variability of the position of this termination associated sequence relative to the 3' termini suggests that additional signals are needed, but no candidate sequences have been identified. The sequence of this element is highly variable among mammalian species. Given this, it is possible that other regulatory sequences could go unrecognized except in comparisons between very closely related taxa. The mitochondrial promoters appear to be examples of such sequences (10,22,26,28,29). In order to identify such labile elements, we determined the sequences of mtDNA control regions and characterized D-loop DNA's from three species of hominoid primates: pygmy chimpanzee, common chimpanzee, and lowland gorilla. These and the sequences published for human (14,19,27,30,31), provide comparisons among four closely related hominoid species.

#### MATERIALS AND METHODS

##### mtDNA Preparation, Cloning and Sequence Analysis

The preparation of mtDNA's from pygmy chimpanzee (Pan paniscus), common chimpanzee (Pan troglodytes), lowland gorilla

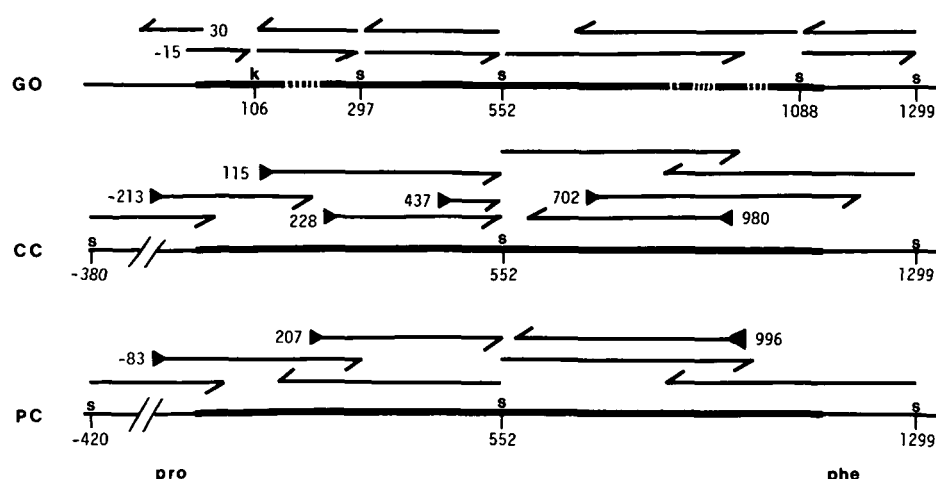

Figure 1. Sequencing strategies for the control regions of gorilla (GO), common chimpanzee (CC) and pygmy chimpanzee (PC) mtDNA's. The control regions (heavy lines) are flanked by the tRNA genes (light lines) for proline (pro) and phenylalanine (phe). Lengths and directions of sequencing runs are indicated by arrows. s and k denote, respectively, SauIII A and KpnI restriction sites. Arrow shafts with triangular ends denote deletion clones; associated numbers indicate the position of the sequencing startpoints for each of these. Small gaps shown in the gorilla control region approximate sites of insertions or deletions. Positions are numbered in agreement with Fig. 2.

(*Gorilla gorilla*) and human (*Homo sapiens*), and the cloning of KpnI and EcoRI/AvaI fragments that contain the control regions and rRNA genes have been described (32-34). The cloned mtDNA fragments were cleaved with SauIII A and subcloned into the BamHI site of M13 vectors for sequence determination (34). Sequencing of large fragments was accomplished by construction of overlapping deletion clones (35). Sequencing strategies used are summarized in Fig. 1. Sequencing was by the chain termination method (36,37), except that the gorilla sequence from a position within the tRNA<sup>Phe</sup> gene through position 30 of Fig. 1 was first obtained using the chemical method (38). Based on this, a primer homologous to positions 16009-16023 of the human sequence (14) was synthesized and used in obtaining the gorilla sequence from positions 1 through 105, Fig. 1, by the chain termination method (37).

## Nucleic Acids Research

```

HO 10 20 30 40 50 60 70 80 90 100
   TTCTTTCATG GGAAGCAGA TTTGGGTACC ACCCAAGTAT TGAATCACC ATCAACAACC GCTATGTATT TCGTACATTA CTGCCAGCCA CCATGAATAT
GO  A A A T -- C G A TT T -
CC  A A A G T C G TT CT -T
PC  A AA G

HO 110 120 130 140 150 160 170 180 190 200
   TGTACGGTAC CATAAA-TAC TTGACCACCT GTAGTACATA AAAACCCA-A TCCACATCAA AACCCCTCC CCATGCTTAC AAGCAAGTAC AGCAATCAAC
GO  A ACG CCA T C [-----] acaaccccc ccttcccccc cccccgcac tg-----
CC  C A -T C CCA T A C - T CT C ccccccgcac tt A T TT A T C C A AT G
PC  AC TA T T C T A A AC T C T A T C A T C A AT G

HO 210 220 230 240 250 260 270 280 290 300
   CCTCAACTAT CACACATCAA CTGCAACTCC AAAGCCACCC CTCACCACT AGGATACCAA CAAACCTACC CACCCTTAAC AGTACATAGT ACATAAAGCC
GO  -----] AC G A T G C T CT ACA A AC GAT
CC  T C G GA A ACA T C A C C C CC C G GA AGT G A C C A C AT
PC  TC G GA - ACA CC C A T C C C CC

HO 310 320 330 340 350 360 370 380 390 400
   ATTTACCGTA CATAGCACAT TACAGTCAAA TCCCTTCTCG TCCCATGGA TGACCCCTCT CAGATAGGGG TCCCTTGACC ACCATCCTCC GTGAATCAAA
GO  T C -ACC C C C C C G AA A A GT
CC  AC T C C C C C CT AA AA GT
PC  A A C C C C C

HO 410 420 430 440 450 460 470 480 490 500
   TATCCCGCAC AAGAGTGCTA CTCTCTCTGC TCCGGGCCCA TAACACTTGG GGGTAGCTAA AGTGAACGT ATCCGACATC TGGTTCTTAC TTCAGGGTCA
GO  - - TC C C
CC  - - C C
PC  - - C C

HO 510 520 530 540 550 560 570 580 590 600
   TAAAGCCTAA ATAGC--CCA CAGTTCCCC TTAATAAGA CAT-CACGAT GGATCACAGG TCTATCACCC TATTAACAC TCACGGGAGC TCTCCATGCA
GO  CA GC TT- AGA TC G CT
CC  G TTC GGA TC G T
PC  G TTC GGA TC

HO 610 620 630 640 650 660 670 680 690 700
   TTTGGTATT- TTCGCTGGG GGGTATGCAC GCGATAGCAT TGCAGAGACG TGGAGCCGGA GCACCCCTATG TCGCAGTATC TGTCTTTGAT TCCTGCCTCA
GO  T - G G --- -- A CC AC
CC  T G G A CC
PC  G G A CC

HO 710 720 730 740 750 760 770 780 790 800
   TCCTATTATT TATCGCACCT ACGTTCAATA TTACAGGCGA ACAT-ACTTA CTAAGTGTG TTAATTAATT AATGCTTGTA GGACATAATA ATAA-CAATT
GO  G CC C G GC AGT G TC TG C C T C C G G
CC  TG GAC T G C G C G G-C
PC  TACG TTAC T G G T C C G G-C

HO 810 820 830 840 850 860 870 880 890 900
   GA-ATGCTG CACAGCCACT TTCCACACAG ACATCATAAC AAAAAATTTC CACCAAAACC CCCCTCCCCC GCTTCTGACC ACAGCACTTA AACACATCTC
GO  G C GAA A C C T CA A A C - - - - - T A C T AG A G C
CC  A A CTCA T A TG CA CA - - - - - C T T
PC  A A AC-CA GT A TG CA CA

HO 910 920 930 940 950 960 970 980 990 1000
   TGCCAAACCC CAAAAACAAA GAACCCCTAAC ACCAGCCTAA CCAGATTTC AATTTTATCT TTTGGCGGTA TGCACCTTTTA ACAGTCACCC CCCAACTAAC
GO  CA T ----- AG G G C C A T T T
CC  T AG T CC C C T
PC  AG T CC C C T

HO 1010 1020 1030 1040 1050 1060 1070 1080 1090 1100
   ACATTATTTT CCCCTCCAC TCCCATACTA CTAATCTCAT CAATACAACC CCC-GCCCAT CCTACCCAGC ACACACACAC CGCTGCTAAC CCCATACCCC
GO  T G-----cagccccc] G - GC - - - - - T T T
CC  TGCC CCC - A- T GC C G CGT TA T C T A- - T T
PC  TG CC CCC - A- T C GC C A C T T T T T

HO 1110 1120 1130
   GAACCAACCA AACCCCAAG ACACCCC-C ACA
GO  TT - A
CC  TA
PC  A G T T A

```

D-loop DNA End-labelling, Isolation and Analysis

D-loop DNA preparation and analysis was modified from (6). The mtDNA samples used for sequence determinations were also used for preliminary D-loop DNA analyses. Additional mtDNA samples were obtained from human, gorilla and common chimpanzee placentas and from gorilla and pygmy chimpanzee livers. D-loop DNA's from 6 humans and 2 individuals from each of the other species were analyzed. 30-100 ng of each mtDNA sample was heated at 80 C for 5 min. to dissociate D-loop DNA, then treated with calf-intestinal alkaline phosphatase. 5' ends were labeled using [ $\gamma$ -<sup>32</sup>P]ATP and polynucleotide kinase (39), and 3' ends using [ $\alpha$ -<sup>32</sup>P]ddATP and terminal transferase (40).

End-labeled D-loop DNA's were electrophoretically separated in denaturing (7M urea) 4% polyacrylamide gels. Bands corresponding to D-loop DNA's were excised from the gel and extracted as described in (38). After centrifugation for 15 min at 13,000 g, the supernatants were removed. The pellets were checked for radioactivity and re-extracted, if necessary, until >80% of the label was recovered. Following two cycles of ethanol precipitation, a portion of each sample was analyzed electrophoretically to verify that the isolated DNA's were identical in mobility to the D-loop DNA's in the original samples.

Equal amounts of the D-loop DNA samples, based on radioactivity, were digested with a large excess of *Hae*III, ethanol precipitated, resuspended, and analyzed by electrophoresis in denaturing 8% polyacrylamide gels. To ensure the generality of the results, these experiments were repeated using mtDNA's isolated from different tissues (liver, placenta) and individuals.

Figure 2. Mitochondrial DNA control region sequences for four hominoids. In the orientation shown, the tRNA gene for proline precedes position 1 and that for phenylalanine follows position 1133. The published human (H0) sequence (14) is shown at the top of each set of four lines. Its numbering has been offset from that in (14); thus, human position 1 corresponds to 16024 of (14). The gorilla (G0), common chimpanzee (CC) and pygmy chimpanzee (PC) sequences are aligned below it, but only differences from the human sequence are shown. A minus (-) indicates that no nucleotide is present. Lower case letters in the gorilla sequence denote nucleotides whose alignment cannot be determined; their placement at positions 151-182 and 1013-1020 is wholly arbitrary. Brackets labeled CSB-1 through CSB-3 denote the conserved sequence blocks defined in (19).

HaeIII digests of  $\phi$ X174 viral DNA (36) and HinfI or HaeII digested, heat-denatured pBR322 DNA (39) were used as single stranded DNA size standards. The  $\phi$ X174 digests reproducibly contained two extra bands, of 504 and 544 nt, which presumably resulted from incomplete digestion of the HaeIII sites between the 310 nt fragment and the adjacent 194 and 234 nt fragments.

## RESULTS

### Control Region Sequences

The aligned control region sequences of common chimpanzee, pygmy chimpanzee and gorilla mtDNA's are presented in Fig. 2, along with the human sequence from (14). The control regions of common and pygmy chimpanzee and human are similar in sequence organization and size (1122, 1113 and 1121 nt, respectively), although numerous base changes and small (1-4 nt) deletions and additions have occurred (Fig. 2; Table 1). The gorilla control region is smaller (982 nt), exhibiting sixteen small (1-4 nt) and at least four large (13-73 nt) unique deletions, but only three unique (1 nt) additions (Fig. 2). In gorilla, sequences of 32 and 8 nt are present in two of the large deleted regions (respectively, positions 139 to 244 and 1005 to 1041, Fig. 2), but it was impossible to determine the alignment of these with the other species. Deletions in gorilla have also occurred in two conserved sequence blocks, CSB-2 and CSB-3, Fig. 2.

### D-loop DNA Sizes and Relative Abundance

Sizes of D-loop DNA's were estimated by denaturing polyacrylamide gel electrophoresis. Each mtDNA sample contained two to four size classes of D-loop DNA's, the relative abundance of which varied between species, individuals and tissues (compare panels A and B of Fig. 3). Three size classes, of 574, 610 and 652 nt, were present in all human samples (lanes 1, Fig. 3A and 3B), and some contained a fourth, of 630 nt. These four size classes were also found in some common chimpanzee samples (lane 2, Fig. 3A), while in others only the three largest size classes were present (lane 2, Fig. 3B). Pygmy chimpanzee samples contained either the two smallest or three largest size classes (lanes 3, Fig. 3A and 3B). Gorilla samples yielded three size classes, of 555, 565 and 590 nt, which were smaller than those

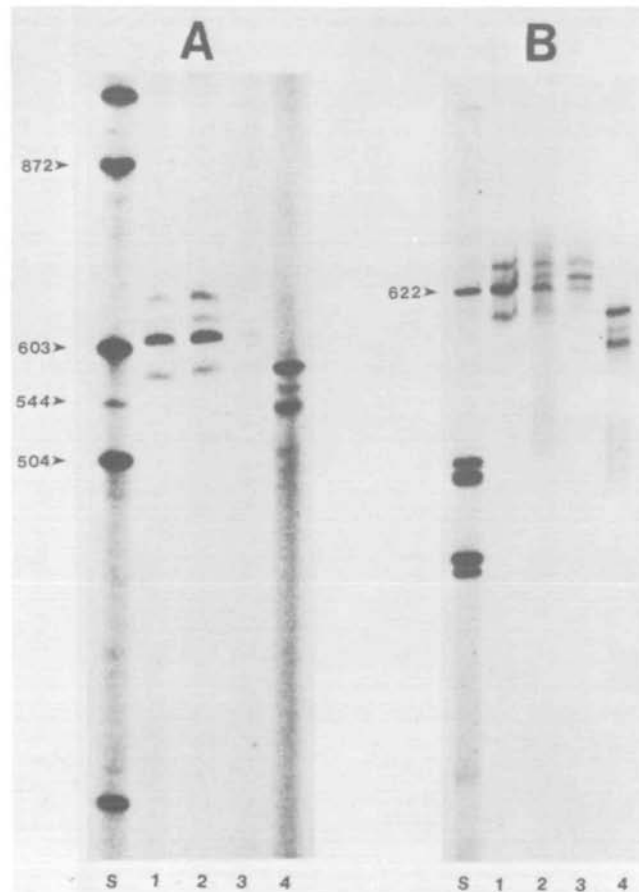

Figure 3. Autoradiograph of full-length, end-labeled D-loop DNA's from two different sets of individuals and separated on denaturing 4% polyacrylamide gels. DNA content of lanes for A and B: 1, human; 2, common chimpanzee; 3, pygmy chimpanzee; 4, gorilla; S, size standards (in A, single-stranded, *Hae*III-digested  $\phi$ X-174 DNA; in B, heat-denatured, *Hae*II-digested pBR322 DNA). Numbers are sizes in nucleotides. D-loop DNA's from the gel displayed in B were eluted and used to map 5' and 3' termini. A samples: human, #WMB151; chimpanzees and gorilla as given in (34). B samples: human, #WMB153; common chimpanzee, PTR/KB#5007"A"; pygmy chimpanzee, SD#21327; gorilla, #YN85-105.

found among the other species (lanes 4, Fig. 3A and 3B).

#### Positions of the 3' Termini

The 3' termini of the D-loop DNA's were determined relative to the *Hae*III site that begins at position 435 of Fig. 2 in all

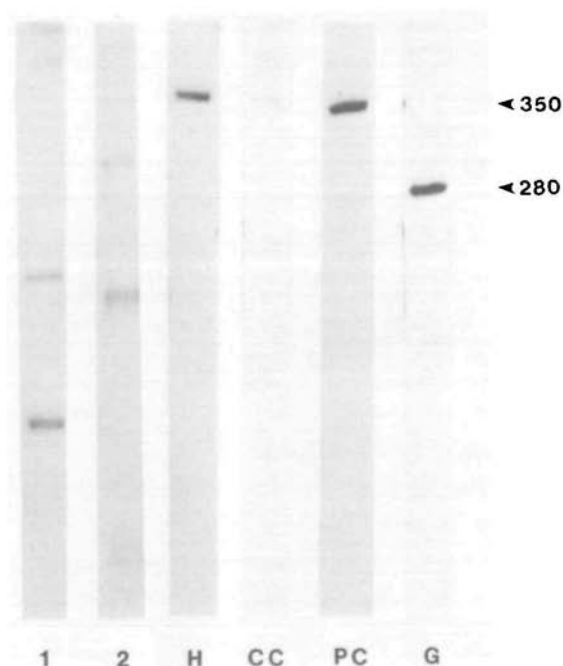

Figure 4. Autoradiograph of HaeIII-digested, 3' end-labeled D-loop DNA's separated on a denaturing 8% polyacrylamide gel. DNA content of lanes: H, human; CC, common chimpanzee; PC, pygmy chimpanzee; G, gorilla; 1, heat-denatured, HaeII-digested pBR322 DNA; 2, heat-denatured, HinfI-digested pBR322 DNA. Numbers are sizes in nucleotides, based on the pBR322 standards (39,p.497).

four species. 3' end-labeled D-loop DNA's were HaeIII digested and the sizes of the labeled fragments were determined. Those from common chimpanzee, pygmy chimpanzee and human migrated identically. In each digest, a fragment of ca. 350 nt was observed, Fig. 4. A second, less intense band corresponding to a fragment of ca. 410 nt was often present in chimpanzee and human digests and is probably a product of incomplete digestion, as reported previously (6). These data indicate that D-loop DNA's in common and pygmy chimpanzees and in human have one, identically-located 3' terminus that maps to position 84 (+4 nt) in Fig. 2. The labeled 3' end fragments in gorilla also migrate as one band, but their size, ca. 280 nt, is 70 nt smaller than in the other species. This size decrement agrees well with that



predicted from the sequence comparisons, in which the gorilla control region lacks 73 nt between positions 139-244 relative to the other species. The 3' termini of the gorilla D-loop DNA's thus map to the same position as those of the other species.

#### Positions of the 5' Termini

The positions of the 5' termini of D-loop DNA's were also determined relative to nearby HaeIII sites. Within the D-loop DNA's, the location of the HaeIII site proximal to the 5' ends differs among the hominoids. In human, the site is at positions 496-499 (Fig. 2). Although this HaeIII site is absent in the human mtDNA sequence shown in Fig. 2, it is present in many human samples (6,9,30,31). In gorilla, the 5'-proximal HaeIII site is at positions 435-438, and in common and pygmy chimpanzees it is at positions 652-655 (see Fig. 2).

5' end-labeled D-loop DNA samples were digested with HaeIII and the sizes of the labeled fragments were determined. The human digests yielded labeled fragments of 163, 200 and 240 nt, Fig. 5. These differed in size by the same amounts as the corresponding full-length human D-loop DNA's, Fig. 3. From the HaeIII site at position 496, the human 5' termini map to positions 644, 701 and 741 (+3 nt), Fig. 2. HaeIII-digestion of common and pygmy chimpanzee mtDNA's yielded major labeled fragments of 47, 69 and 91 nt, Fig. 5. From the HaeIII site at position 652, two of these termini map to the same approximate positions (700 and 744) as two of the human termini, and the third maps to position 722. Although 5' termini mapping to position 722 were not observed among the human D-loop DNA samples used in this analysis, the fourth D-loop DNA size class (630 nt) that was seen in some human samples (see preceding section) would presumably have its 5' terminus at this position. Similarly, if the chimpanzee DNA's shown in Fig. 3 (lanes A-2 and A-3) had been used, they would have generated a fourth band, of 12 nt, whose 5' terminus would be at position 664. A few faint bands differing in size by 1-3 nt from the major bands appear in human and chimpanzee samples in Fig. 5. These could reflect size variation in the mtDNA control region within an individual, slight variation in the exact position of the 5' terminus, or variation due to degradation during the manipulation of the samples.

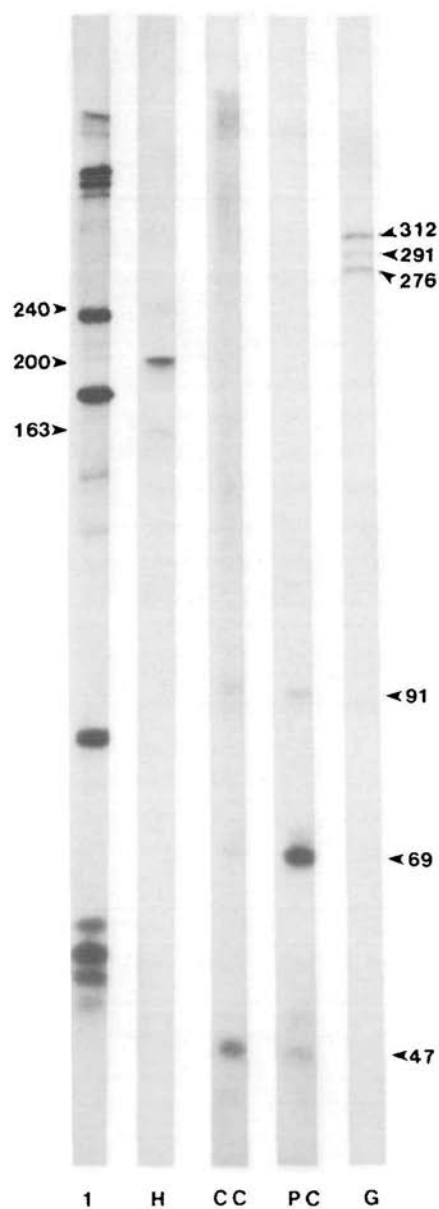

Figure 5. Autoradiograph of *Hae*III-digested, 5' end-labeled D-loop DNA's separated on a denaturing 8% polyacrylamide gel. Lane contents as in Fig. 4. The sizes of the human D-loop DNA fragments are indicated on the left, those of the gorilla and the chimpanzees' on the right. The faint bands in the standard (lane 1) are undenatured *Hae*III-digested pBR322 DNA fragments.

TABLE 1. Pairwise comparisons of control region sequences<sup>a</sup>

| Species | Number<br>of nt<br>compared <sup>b</sup> | Percentage<br>sequence<br>difference | Numbers of           |                        | S/V   |
|---------|------------------------------------------|--------------------------------------|----------------------|------------------------|-------|
|         |                                          |                                      | Transi-<br>tions (S) | Transver-<br>sions (V) |       |
| HO/GO   | 903                                      | 13.5                                 | 82                   | 40                     | 2.1   |
| HO/CC   | 969                                      | 11.8                                 | 95                   | 19                     | 5.0   |
|         | (1107)                                   | (13.4)                               | (116)                | (32)                   | (3.6) |
| HO/PC   | 975                                      | 12.4                                 | 102                  | 19                     | 5.4   |
|         | (1113)                                   | (14.0)                               | (124)                | (32)                   | (3.9) |
| GO/CC   | 897                                      | 17.2                                 | 108                  | 46                     | 2.3   |
| GO/PC   | 898                                      | 17.3                                 | 106                  | 49                     | 2.2   |
| CC/PC   | 973                                      | 8.4                                  | 70                   | 12                     | 5.8   |
|         | (1111)                                   | (9.6)                                | (87)                 | (19)                   | (4.6) |

a. Species abbreviated as in Fig. 2. All numbers are from direct comparisons of the sequences shown in Fig. 2, and are uncorrected for multiple substitution events.

b. Positions 140-244 and 1005-1041 and all other additions and deletions have been excluded from the comparisons. The values for species pairs between which positions 140-244 and 1005-1041 (Fig. 2) can be included are shown in parentheses.

In gorilla D-loop DNA's, the 5' HaeIII fragments are of 276, 291 and 312 nt, Fig. 5. The 5' termini thus map to positions 719, 734 and 756 (+3 nt) when referenced to the HaeIII site beginning at position 435 in Fig. 2. The terminus estimated to be at position 720 may correspond to the chimpanzee terminus at 722, but the other termini are apparently unique to gorilla. Noting the numerous sequence differences between gorilla and the other species in this region (particularly in the intervals 700-710 and 735-760), this difference is not surprising.

#### DISCUSSION

##### Sequence Comparisons of the Hominoid Control Regions

The control region contains sequences vital for transcription and replication. However, substitutions, additions and deletions accumulate more rapidly in this than in other mtDNA regions (2,3,41). This is due both to some apparently functionless DNA segments and to others whose primary sequence is unimportant (3). The divergence among hominoids, apparent in Fig.

2, is summarized in Table 1. Two sets of numbers are presented, based on inclusion or exclusion of the sequence intervals 140-244 and 1005-1041 (Fig.2). Most of the gorilla sequence in these intervals is deleted; the remainder cannot be meaningfully aligned. Accordingly, these intervals were not included in any comparison involving gorilla. When these two intervals are excluded from all comparisons, the sequences of common and pygmy chimpanzee are most similar, human and chimpanzees' are next most similar, and gorilla is least similar (Table 1). If relationships between species and sequence are proportional, then human and chimpanzees are closer to one another than either is to gorilla. This interpretation is supported by transition/transversion ratios (S/V, Table 1) which, among closely related species, are inversely proportional to the product of divergence time and substitution rate (2,3,42). This is the strongest support that mtDNA comparisons have provided in differentiating the order of evolutionary relatedness among human, chimpanzee and gorilla (see 34), but it is valid only if mtDNA substitution rates are approximately equal among these species.

In these comparisons, the S/V ratios in the control region are much lower than in regions containing protein, tRNA and rRNA genes (34,42). Given the higher substitution rate observed in the control region (30,41), an increased proportion of multiply-substituted positions and, thus, a greater proportion of transversions is expected (see 30 and 42 for details).

#### Extensive Length Difference in the Gorilla Control Region

A deletion in or adjacent to the control region of gorilla was inferred from cleavage map comparisons of hominoid mtDNA's (43). As the present study shows, there are actually a large number of deletions in gorilla (Fig. 2). The largest of these (i.e., those on the intervals 140-244 and 1005-1041 of Fig. 2) probably represent the fusion of many small deletions, rather than single events. This also appears to be the case for a portion of the control region sequence from African green monkey (44). Deletion sites in gorilla are often adjacent to homopolymer sequences, suggesting that they may have arisen by slipped-mispairing during mtDNA replication (34,45,46).

### Promoter Sequences

The human mtDNA L- and H-strand promoters lie, respectively, either at positions 991-1005 and 1091-1112 of Fig. 2 (23), or at 956-972 and 1101-1123 (22,47). Among the hominoids, 991-1005 and 956-972 differ by 8 and 2 substitutions, respectively, at 6 of 15 and 2 of 17 positions. Based on sequence conservation, the data suggest that the L-strand promoters are on the interval 956-972. No such conservation-based discrimination is possible for the H-strand promoters: the sequences 1091-1112 and 1101-1123 differ by 7 and 5 substitutions at 6 of 22 and 5 of 23 positions, respectively. However, positions 1106-1121 are identical in these species, and include the nucleotides (1113-1115) identified by *in vitro* mutagenesis as being the most important for H-strand transcription (47). The comparisons thus support the promoter locations identified in (22).

### Transcription Factor Binding Sequences

Four sites bind, *in vitro*, a partially purified mitochondrial transcription factor (mtTF) in the human control region (21). Sites mtTF-L (positions 973-1000 in Fig. 2) and mtTF-H (1081-1108) are immediately upstream of the respective promoters; sites mtTF-X (831-858) and mtTF-Y (786-816) are between conserved sequence blocks 1 and 2 (21). A consensus sequence has been suggested (21) in which 7 positions are absolutely conserved. However, 6 of the 7 are not conserved in the mtDNA's of gorilla and the chimpanzees, and two are polymorphic in a sample of 7 humans (30). Based on the alignments in Fig. 2, average sequence similarities (mean $\pm$ SD) for all pairwise comparisons of orthologous mt-TF binding sites are: L=94 $\pm$ 2%, H=85 $\pm$ 7%, X=79 $\pm$ 15%, and Y=61 $\pm$ 14%. Sites L and H show no deletions, and the SD's are small. Sites X and Y show deletions and larger SD's. On average, X is 94% similar among human and chimpanzees, but only 65% among these and gorilla. X has 1 nt deleted in common chimpanzee, and 7 nt in gorilla. Y is located in one of the most variable parts of the control region. Pairwise, this site differs, on average, at 12 nt, including two deletions of 1 nt each. These comparisons indicate that sites L and H probably provide similar functions in chimpanzees, gorilla and human, and

that X and Y, if functional, are under more relaxed constraints than L and H.

Sequences Associated with D-loop DNA Synthesis

There is presently no in vitro system for directly investigating mammalian mtDNA replication and D-loop DNA formation, and insights into these processes must come from comparative data. The control region sequences from a number of distantly related mammalian species are known, and their comparison has resulted in identification of several conserved elements that could be important for D-loop DNA initiation and termination (10,12,13, 15,19,27). Comparisons of control region sequences from pygmy chimpanzee, common chimpanzee and gorilla add information about some of the sequences necessary for these processes.

Little is known about how the 3' and 5' termini of D-loop DNA's are formed. Published evidence indicates that D-loop DNA synthesis is primed by an RNA whose transcription is initiated at the L-strand promoter (24,26), and that the 5' termini of D-loop DNA's are formed by subsequent processing events (25). Although it is currently assumed that the 3' termini are formed by synthesis termination, the possibility that these ends are also processed has not been excluded.

Sizes for the HaeIII-fragments of the D-loop DNA's were estimated from calibration curves obtained with precisely-known size standards. Variability was generally  $\leq 1\%$  of mean fragment length, based on repeated determinations and on comparisons of the estimates for the human D-loop DNA fragments, whose precise lengths are known from sequencing (19,25,27).

Sequences Near D-loop DNA 3' Termini. A moderately conserved, termination associated sequence (TAS) has been identified upstream from the 3' end of each D-loop DNA (12,27). Species with multiple 3' termini have a matching number of TAS (12,27). One TAS-like element was identified in mtDNA's of chimpanzees and gorilla (positions 135-151, Fig. 6). As summarized in Fig. 7 for 37 vertebrate TAS, the consensus sequence appears to be:

TACATtAAAaYYAAT

[Y = C or T; bases at positions shown in lower case are invariant, but occur in <50% of the TAS]. A large amount of sequence

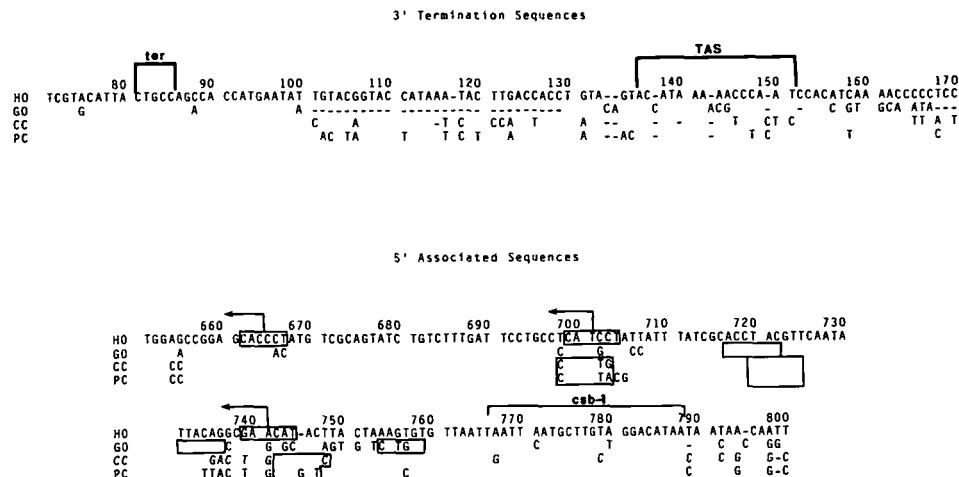

Figure 6. L-strand sequences in regions complementary to the 3' and 5' ends of the hominoid D-loop DNA's. Abbreviations and notation as in Fig. 2. Upper figure: The bracket labeled ter denotes the sequence to which 3' termini map; that labeled TAS is the termination-associated sequence. The portion of gorilla mtDNA from positions 101-140 in Fig. 2 has been renumbered as 130-167 and a 29 nt gap inserted between positions 100 and 130, above, in order to align the TAS. Lower figure: Boxed sequences indicate the sites to which 5' termini map. The arrows above the human sequence indicate the direction of D-loop DNA synthesis. csb-1, conserved sequence block 1 (19).

and length diversity is present among different individuals in the same species and among TAS that co-occur in the same mtDNA (see Fig. 7). The gorilla TAS is perhaps the most aberrant.

Positions of the 3' termini appear identically located among hominoids. Sequences associated with both the 3' and 5' termini are displayed in Fig. 6. In the two chimpanzee species the 3' termini are ca. 51 nt downstream from the TAS. This is the same as in human (27), in which the 3' terminus maps to positions 81-83 (CTG, Fig. 6). Gorilla exhibits both length and sequence divergence in this interval. Positions occupied by the TAS in human and the chimpanzees are mostly deleted in gorilla, which has, instead, a TAS sequence 25 nt further downstream [positions 108-124 of Fig. 2 (= 135-151 of Fig. 6)]. Thus, the 3' termini map to the same position, although in gorilla this position is

```

HUMAN(1)  TAC-AT-AAAAACCC--A-AT
" (2)    TAC-AT-AAAAACCC--A-AC
" (3)    TAC-AT-AAAAATCC--A-AC
" (4)    TAC-AT-AGAAACCC--A-AT
" (5)    TAC-AT-AAAAACCC--A-AT
" (6)    TAC-AT-AAAAACCC--A-AT
" (7)    TAC-AT-AAAAACCC--A-AT
CCHIMP    TAC-AT-AAAA-TCC--AC-T
PCHIMP    CAC-AT-AAAAACCT--ACAT
GORILLA   TACCAT-AAAA-CGCCCA-AT
MOUSE     CAC-ATTAAA--CT---A-AT
"         AAC-AT-AAA--TC---A-AT
"         TAC-ATTAAA--TC---A-AT
"         TAC-ATTAAA--CT----AT
RAT(RE)   TAC-ATTAA--TTT----AT
"         TAT-AT-ATAA-TT---A-AT
"         AACTA--AAAA-TTT--AAAC
"         TAC-ATTAGA-T----A-AT
RAT(NB)   TAC-ATTAAA--TT----AT
"         TAT-AT-ATA--TCT--A-AT
"         AACTAT-AAA--TTC----AT
"         TAC-ATTAGAA-T---A-AT
RAT(NC)   TAC-ATTAAA--TT----AT
"         TAT-AT-ATA--TTT--A-AT
"         AACTAT-AAA--TTC----AT
"         TAC-ATTAAA-T---A-AT
RAT(NA)   TAC-ATTAAA--TT----AT
"         TAT-AT-ATA--TCT--A-AT
"         AACTAT-AAA--TTC----AC
"         TAC-ATTAGA--T---A-AT
PIG       TAC-AT-A-----TT-----AT
"         TAC-AT-A-----TC-----AT
COW       TAC-AT-AA---C-----AT
"         AAC-AT-AA---T-----AT
"         TAC-ATTAAA--TT-----AT
XENOPUS   TACAAT-AAAA-C-----AT
"         TACAATTAAA--C-----AT

```

## CONSENSUS:

T<sub>78</sub>A<sub>100</sub>C<sub>89</sub>A<sub>100</sub>T<sub>97</sub>A<sub>100</sub>A<sub>75</sub>A<sub>84</sub>A<sub>43</sub>Y<sub>100</sub>Y<sub>81</sub>Y<sub>51</sub>A<sub>62</sub>A<sub>97</sub>T<sub>89</sub>

Figure 7. Alignment of 36 termination associated sequences (TAS) from 11 species. Subscripts in the consensus sequence denote the percent frequency of occurrence of each nucleotide. HUMAN (#1-7) are TAS from 7 different individuals. CCHIMP and PCHIMP are common and pygmy chimpanzee, respectively; MOUSE is *Mus domesticus*, RAT(RE) is *Rattus rattus*, and RAT(NA,NB,NC) three different *R. norvegicus*. Some species have multiple TAS per mtDNA (mouse, rats = 4; pig = 2; cow = 3). Sequence sources: gorilla, common chimpanzee and pygmy chimpanzee, this study; human, (14,19,27,30,31; numbered as in Table 1 of ref. 30); mouse, (27); cow and pig, (12); rats, (16); *Xenopus*, (17).

only 25 nt from the TAS. Despite this change, the variation in distance from the TAS to the 3' termini (25-51 nt) is within the range reported for other mammalian species (12,27).

As an alternative hypothesis, termination might be directed by a sequence element at or directly adjacent to the termination site, like that found in the interval 76-87 of Fig. 2. Except for the TAS, however, there are no notable sequence similarities



in the regions to which the 3' termini of other mammalian D-loop DNA's map. Moreover, in species with multiple 3' termini (e.g., mouse, rat, cow, Xenopus), the sequences within which the individual termini map are different (12,17,27).

It has been suggested that computer-derived secondary structures flanking the D-loop might regulate its formation (8,16,48). Based on analyses of sequences near the 3' termini in cow, pig, mouse, human, and Xenopus, one group (8) hypothesized that secondary structures containing the conserved sequence TACAT (at positions 135-139 of the human sequence, Fig. 2) may play a role in termination. Similar structures can be hypothesized for the other hominoid sequences in this region, but with TACAT changed to CACAT in gorilla and pygmy chimpanzee. However, among vertebrate species these hypothetical structures and the 3' termini are uncorrelated in either number or positional relationship (the structures may be either 5' or 3' to the termini, depending on the species chosen). Also, there is no basic similarity in the form of the hypothetical structures between species.

Because the number of TAS and the number of 3' termini are identical, and because the TAS are always upstream from the 3' termini (albeit at a variable distance), the TAS hypothesis is presently better supported than any other. Further sequence comparisons from additional individuals and species will aid in the refinement of the questions that must be addressed regarding TAS, other (as yet unidentified) sequences, and the relevance of secondary structures. However, it appears unlikely that such comparisons will lead to a definitive understanding of D-loop DNA termination. For this, functional assays must be developed.

Sequences Near D-loop DNA 5' Termini. In several vertebrate species, three conserved sequence blocks (CSB's) are present upstream from the 5' termini (19,20). These CSB's are also in the chimpanzees and gorilla, Fig. 2. There is evidence from human and mouse mtDNA that a switch from RNA to DNA synthesis can occur at CSB-1 (24,26). The average similarity among these hominoids is 91±6% for CSB-1, and the 5' termini of the largest D-loop DNA's are located just 3' to it (Fig. 6). However, the data for the chimpanzees and gorilla (Figs. 5 and 6), as well as those for human (6,9,24), rodents (18,19,26), and Xenopus (17)

indicate that the 5' termini of most D-loop DNA's originate 10-100 nt downstream from CSB-1 (Fig. 6). Thus, even if CSB-1 is the signal for the switch from RNA to DNA synthesis, most of the 5' termini must be formed by subsequent processing events, and additional sequence elements must be involved.

Among the hominoids, substitutions have occurred in all three CSB's. Also, parts of CSB-2 and 35% of CSB-3 have been deleted from the gorilla sequence. The reconstituted CSB-2 sequence in gorilla differs at only 2 of 17 positions from CSB-2 in the other hominoids, an amount of variation that is tolerated between different individuals and species (19,30,49). No functions are known for either CSB-2 or CSB-3, and part of CSB-2 and all of CSB-3 have been deleted from cow mtDNA (15; also see Fig. 3 in ref. 3 and Fig. 11 in ref. 10). Although no conclusions concerning CSB-2 may be drawn, the marked divergence of CSB-3 between gorilla and the other hominoids and the absence of CSB-3 from cow argue against its involvement in D-loop DNA initiation.

When the sequences to which the 5' termini of the hominoid D-loop DNA's map are examined (Fig. 6), all are seen to contain an adenine flanked on each side by a pyrimidine (YAY). This correlation holds for the 5' termini of gorilla D-loop DNA's that map to positions different from those of the other species and also for the major 5' termini of other mitochondrial D-loop DNA's [e.g., mouse (26), rat (18), and *Xenopus* (8,17)]. The trinucleotide YAY also occurs at an analogous position in the yeast mtDNA origin of replication, where it marks the point of transition from RNA to DNA synthesis (50). In contrast, YAY is not usually present at the sites of RNA to DNA transition in bacterial origins of replication (51).

Without functional evidence there can be no rigorous conclusion that YAY is required for 5' terminus formation. However, for current data, the correlation between the positions of all major 5' termini and YAY is perfect [*Xenopus* (8,17); rat (18); mouse (19,26); cow (10,11; W. W. Hauswirth, personal communication); pig (W. W. Hauswirth, personal communication); human (19); three ape species (this study)]. One possibility is that YAY, in concert with other mtDNA sequences or structures, forms part of a site that is recognized by a processing enzyme. In

this regard, we note that there are a number of YAY sequences in this region to which no 5' termini map, indicating that if YAY plays a role in 5' terminus formation, then additional sequence elements must also be required.

#### ACKNOWLEDGMENTS

We thank O. Ryder of the San Diego Zoo and H. McClure and C. Allen of Yerkes Primate Center for primate tissues; L. Szura for technical assistance; J. Boore, R. Cox, T. Dowling, C. Moritz, D. Smith and L. Vawter for manuscript reviews; and D. Bay for photography. Supported by USPHS grants GM30144 and RR07050 from the NIH and by Rackham and Phoenix grants from the University of Michigan. J.E.H. received partial salary support from USPHS training grant GM07544 and from a University of Michigan Cancer Research Institute Fellowship.

\*To whom correspondence should be addressed

+Present address: Department of Genetics, Southwest Foundation for Biomedical Research, P.O. Box 28147, San Antonio, TX 78284

#### REFERENCES

1. Attardi, G. (1985) In Reanney, D. and Chambon, P. (eds), *Genome Evolution in Prokaryotes and Eukaryotes*, Academic Press, New York, pp. 93-145.
2. Brown, W.M. (1983) In Nei, M. and Koehn, R.K. (eds), *Evolution of Genes and Proteins*, Sinauer Associates, Sunderland, Massachusetts, pp. 62-88.
3. Brown, W.M. (1985) In MacIntyre, R.J. (ed), *Molecular Evolutionary Genetics*, Plenum Press, New York, pp. 95-130.
4. Clayton, D.A. (1982) *Cell* **28**, 693-705.
5. Clayton, D.A. (1984) *Annu. Rev. Biochem.* **53**, 573-594.
6. Brown, W.M., Shine, J. and Goodman, H.M. (1978) *Proc. Natl. Acad. Sci. USA* **75**, 735-739.
7. Densmore, L.D., Wright, J.W. and Brown, W.M. (1985) *Genetics* **110**, 689-707.
8. Dunon-Bluteau, D.C. and Brun, G.M. (1987) *Biochem. Int.* **14**, 643-657.
9. Gillum, A.M. and Clayton, D.A. (1978) *Proc. Natl. Acad. Sci. USA* **75**, 677-681.
10. King, T.C. and Low, R.L. (1987) *J. Biol. Chem.* **262**, 6204-6213.
11. King, T.C. and Low, R.L. (1987) *J. Biol. Chem.* **262**, 6214-6220.
12. MacKay, S.L.D., Olivo, P.D., Laipis, P.J. and Hauswirth, W.W. (1986) *Mol. Cell. Biol.* **6**, 1261-1267.
13. Tapper, D.P. and Clayton, D.A. (1981) *J. Biol. Chem.* **256**, 5109-5115.
14. Anderson, S., Bankier, A.T., Barrell, B.G., de Bruijn, M.H.L., Coulson, A.R., Drouin, J., Eperon, I.C., Nierlich, D.P., Roe, B.A., Sanger, F., Schreier, P.H., Smith, A.J.H., Staden, R. and Young, I.G. (1981) *Nature* **290**, 457-465.

15. Anderson, S., de Bruijn, M.H.L., Coulson, A.R., Eperon, I.C., Sanger, F. and Young, I.G. (1982) *J. Mol. Biol.* **156**, 683-717.
16. Brown, G.G., Gadaleta, G., Pepe, G., Saccone, C. and Sbisà, E. (1986) *J. Mol. Biol.* **192**, 503-511.
17. Cairns, S.S. and Bogenhagen, D.F. (1987) *J. Biol. Chem.* **261**, 8481-8487.
18. Sekiya, T., Kobayashi, M., Seki, T. and Koike, K. (1980) *Gene* **11**, 53-62.
19. Walberg, M.W. and Clayton, D.A. (1981) *Nucleic Acids Res.* **9**, 5411-5420.
20. Wong, J.F.H., Ma, D-P, Wilson, R.K. and Roe, B.A. (1983) *Nucleic Acids Res.* **11**, 4977-4995.
21. Fischer, R.P., Topper, J.N. and Clayton, D.A. (1987) *Cell* **50**, 247-258.
22. Chang, D.D. and Clayton, D.A. (1984) *Cell* **36**, 635-643.
23. Montoya, J., Christianson, T., Levens, D., Rabinowitz, M. and Attardi, G. (1982) *Proc. Natl. Acad. Sci. USA* **79**, 7195-7199.
24. Chang, D.D. and Clayton, D.A. (1985) *Proc. Natl. Acad. Sci. USA* **82**, 351-355.
25. Chang, D.D. and Clayton, D.A. (1987) *EMBO J.* **6**, 409-417.
26. Chang, D.D., Hauswirth, W.W. and Clayton, D.A. (1985) *EMBO J.* **4**, 1559-1567.
27. Doda, J.N., Wright, C.T. and Clayton, D. A. (1981) *Proc. Natl. Acad. Sci. USA* **78**, 6116-6120.
28. Bogenhagen, D.F., Yoza, B.K. and Cairns, S.S. (1986) *J. Biol. Chem.* **261**, 8488-8494.
29. Chang, D.D., Wong, T.W, Hixson, J.E. and Clayton, D.A. (1985) In Quagliariello, E., Slater, E.C., Palmieri, F., Saccone, C. and Kroon, A.M. (eds), *Achievements and Perspectives of Mitochondrial Research*, Elsevier, Amsterdam, pp. 135-144.
30. Aquadro, C.F. and Greenberg, B.D. (1983) *Genetics* **103**, 287-312.
31. Greenberg, B.D., Newbold, J.E. and Sugino, A. (1983) *Gene* **21**, 33-49.
32. Brown, W.M., George, M. and Wilson, A.C. (1979) *Proc. Natl. Acad. Sci. USA* **76**, 1967-1971.
33. Brown, W.M. and Vinograd, J. (1974) *Proc. Natl. Acad. Sci. USA* **71**, 4617-4621.
34. Hixson, J.E. and Brown, W.M. (1986) *Mol. Biol. Evol.* **3**, 1-18.
35. Hong, C.F. (1982) *J. Mol. Biol.* **158**, 539-549.
36. Sanger, F., Air, G.M., Barrell, B.G., Brown, N.L., Coulson, A.R., Fiddes, J.C., Hutchison, C.A., Slocombe, P.M. and Smith, M. (1977) *Nature* **265**, 687-695.
37. Sanger, F., Nicklen, S. and Coulson, A.R. (1977) *Proc. Natl. Acad. Sci. USA* **74**, 5463-5467.
38. Maxam, A. and Gilbert, W. (1980) *Methods in Enzymology* **65**, 499-560.
39. Maniatis, T., Fritsch, E.F. and Sambrook, J. (1982) *Molecular Cloning*, Cold Spring Harbor Laboratory, Cold Spring Harbor, New York.
40. Yousaf, S.I., Carroll, A.R. and Clarke, B.E. (1984) *Gene* **27**, 309-313.

41. Upholt, W.B. and Dawid, I.B. (1977) *Cell* 11, 571-583.
42. Brown, W.M., Prager, E.M., Wang, A. and Wilson, A.C. (1982) *J. Mol. Evol.* 18, 225-239.
43. Ferris, S.D., Wilson, A.C. and Brown, W. M. (1981) *Proc. Natl. Acad. Sci. USA* 78, 2432-2436.
44. Karawya, E.M. and Martin, R.G. (1987) *Biochim. Biophys. Acta* 909, 30-34.
45. Albertini, A.M., Hofer, N., Calos, M.P. and Miller, J.H. (1982) *Cell* 29, 319-328.
46. Streisinger, G., Okada, Y., Emrich J., Newton, J., Tsugita, A., Terzaghi, E. and Inouye, M. (1966) *Cold Spring Harbor Symp. Quant. Biol.* 31, 77-84.
47. Hixson, J.E. and Clayton, D.A. (1985) *Proc. Natl. Acad. Sci. USA* 82, 2660-2664.
48. Saccone, C., Attimonelli, M. and Sbisà, E. (1985) In Quagliariello, E., Slater, E.C., Palmieri, F., Saccone, C. and Kroon, A.M. (eds), *Achievements and Perspectives of Mitochondrial Research*, Elsevier, Amsterdam, pp. 37-47.
49. Hauswirth, W.W., Van De Walle, M.J., Laipis, P.J. and Olivo, P.D. (1984) *Cell* 37, 1001-1007.
50. Baldacci, G., Cherif-Zahar, B. and Bernardi, G. (1984) *EMBO J.* 3, 2115-2120.
51. Zyskind, J.W. and Smith, D.W. (1986) *Cell* 46, 489-490.
